# Supplementary material for: Chemical space: limits, evolution and modelling of an object bigger than our universal library
Source: Royal Society of Chemistry journal article supplement (doi:10.1039/d2dd00030j), 2022-01-01
Supplement: d2dd00030j1.pdf [file d2dd00030j1.pdf]

Supplementary Information to  
**Chemical space: limits, evolution and modelling of an object bigger than our universal library**  
Guillermo Restrepo

Table S1. Chemical diversity of the universe. Data retrieved from the Supplementary Information from Melvin M. Vopson, "Estimation of the information contained in the visible matter of the universe", AIP Advances 11, 105317 (2021) <https://doi.org/10.1063/5.0064475> and from p. 4 in N. Greenwood and A. Earnshaw, Chemistry of the Elements, Elsevier Science, 2012.

| <b>Element</b> | <b>Weight abundance (%)</b> | <b>Molar mass (g/mol)</b> | <b>Weight in the universe</b> | <b>Atoms in the universe</b> |
|----------------|-----------------------------|---------------------------|-------------------------------|------------------------------|
| Hydrogen       | 75                          | 1.008                     | 1.0875E+053                   | 6.4948E+76                   |
| Helium         | 23                          | 4.0026                    | 3.335E+052                    | 5.0159E+75                   |
| Oxygen         | 1                           | 15.9999                   | 1.45E+051                     | 5.4557E+73                   |
| Carbon         | 0.5                         | 12.011                    | 7.25E+050                     | 3.6338E+73                   |
| Neon           | 0.13                        | 20.1797                   | 1.885E+050                    | 5.6233E+72                   |
| Iron           | 0.11                        | 55.845                    | 1.595E+050                    | 1.7194E+72                   |
| Nitrogen       | 0.1                         | 14.007                    | 1.45E+050                     | 6.2319E+72                   |
| Silicon        | 0.07                        | 28.085                    | 1.015E+050                    | 2.1756E+72                   |
| Magnesium      | 0.059                       | 24.305                    | 8.555E+049                    | 2.1190E+72                   |
| Sulphur        | 0.05                        | 32.06                     | 7.25E+049                     | 1.3614E+72                   |
| Argon          | 0.02                        | 39.948                    | 2.9E+049                      | 4.3702E+71                   |
| Calcium        | 0.007                       | 40.078                    | 1.015E+049                    | 1.5246E+71                   |
| Nickel         | 0.006                       | 58.6934                   | 8.7E+048                      | 8.9233E+70                   |
| Aluminium      | 0.005                       | 26.9815                   | 7.25E+048                     | 1.6176E+71                   |
| Sodium         | 0.002                       | 22.9897                   | 2.9E+048                      | 7.5938E+70                   |
| Chromium       | 0.0015                      | 51.9961                   | 2.175E+048                    | 2.5182E+70                   |
| Manganese      | 0.0008                      | 54.938                    | 1.16E+048                     | 1.2711E+70                   |
| Phosphorus     | 0.0007                      | 30.9738                   | 1.015E+048                    | 1.9727E+70                   |
| Cobalt         | 0.0003                      | 58.9331                   | 4.35E+047                     | 4.4435E+69                   |
| Titanium       | 0.0003                      | 47.867                    | 4.35E+047                     | 5.4708E+69                   |
| Potassium      | 0.0003                      | 39.0983                   | 4.35E+047                     | 6.6977E+69                   |
| Vanadium       | 0.0001                      | 50.9415                   | 1.45E+047                     | 1.7135E+69                   |
| Chlorine       | 0.0001                      | 35.45                     | 1.45E+047                     | 2.4623E+69                   |
| Fluorine       | 4E-05                       | 18.9984                   | 5.8E+046                      | 1.8378E+69                   |
| Zinc           | 3E-05                       | 65.38                     | 4.35E+046                     | 4.0054E+68                   |
| Germanium      | 2E-05                       | 72.63                     | 2.9E+046                      | 2.4037E+68                   |
| Copper         | 6E-06                       | 63.546                    | 8.7E+045                      | 8.2419E+67                   |
| Zirconium      | 5E-06                       | 91.224                    | 7.25E+045                     | 4.7844E+67                   |
| Strontium      | 4E-06                       | 87.62                     | 5.8E+045                      | 3.9849E+67                   |
| Krypton        | 4E-06                       | 83.798                    | 5.8E+045                      | 4.1667E+67                   |
| Selenium       | 3E-06                       | 78.971                    | 4.35E+045                     | 3.3160E+67                   |
| Scandium       | 3E-06                       | 44.9559                   | 4.35E+045                     | 5.8250E+67                   |
| Lead           | 1E-06                       | 207.2                     | 1.45E+045                     | 4.2128E+66                   |
| Neodymium      | 1E-06                       | 144.242                   | 1.45E+045                     | 6.0516E+66                   |
| Cerium         | 1E-06                       | 140.116                   | 1.45E+045                     | 6.2298E+66                   |
| Barium         | 1E-06                       | 137.327                   | 1.45E+045                     | 6.3564E+66                   |
| Xenon          | 1E-06                       | 131.293                   | 1.45E+045                     | 6.6485E+66                   |

|              |       |          |            |            |
|--------------|-------|----------|------------|------------|
| Rubidium     | 1E-06 | 85.4678  | 1.45E+045  | 1.0213E+67 |
| Gallium      | 1E-06 | 69.723   | 1.45E+045  | 1.2520E+67 |
| Tellurium    | 9E-07 | 127.6    | 1.305E+045 | 6.1568E+66 |
| Arsenic      | 8E-07 | 74.9216  | 1.16E+045  | 9.3207E+66 |
| Yttrium      | 7E-07 | 88.9058  | 1.015E+045 | 6.8728E+66 |
| Bromine      | 7E-07 | 79.904   | 1.015E+045 | 7.6471E+66 |
| Lithium      | 6E-07 | 6.94     | 8.7E+044   | 7.5467E+67 |
| Platinum     | 5E-07 | 195.084  | 7.25E+044  | 2.2372E+66 |
| Samarium     | 5E-07 | 150.36   | 7.25E+044  | 2.9027E+66 |
| Molybdenum   | 5E-07 | 95.95    | 7.25E+044  | 4.5487E+66 |
| Tin          | 4E-07 | 118.71   | 5.8E+044   | 2.9413E+66 |
| Ruthenium    | 4E-07 | 101.07   | 5.8E+044   | 3.4546E+66 |
| Osmium       | 3E-07 | 190.23   | 4.35E+044  | 1.3766E+66 |
| Iridium      | 2E-07 | 192.217  | 2.9E+044   | 9.0824E+65 |
| Ytterbium    | 2E-07 | 173.045  | 2.9E+044   | 1.0089E+66 |
| Erbium       | 2E-07 | 167.259  | 2.9E+044   | 1.0438E+66 |
| Dysprosium   | 2E-07 | 162.5    | 2.9E+044   | 1.0743E+66 |
| Gadolinium   | 2E-07 | 157.25   | 2.9E+044   | 1.1102E+66 |
| Praseodymium | 2E-07 | 140.9077 | 2.9E+044   | 1.2390E+66 |
| Lanthanum    | 2E-07 | 138.9055 | 2.9E+044   | 1.2568E+66 |
| Cadmium      | 2E-07 | 112.414  | 2.9E+044   | 1.5530E+66 |
| Palladium    | 2E-07 | 106.42   | 2.9E+044   | 1.6405E+66 |
| Niobium      | 2E-07 | 92.9064  | 2.9E+044   | 1.8791E+66 |
| Mercury      | 1E-07 | 200.592  | 1.45E+044  | 4.3516E+65 |
| Iodine       | 1E-07 | 126.9045 | 1.45E+044  | 6.8784E+65 |
| Boron        | 1E-07 | 10.81    | 1.45E+044  | 8.0749E+66 |
| Beryllium    | 1E-07 | 9.0122   | 1.45E+044  | 9.6858E+66 |
| Caesium      | 8E-08 | 132.9055 | 1.16E+044  | 5.2543E+65 |
| Bismuth      | 7E-08 | 208.9804 | 1.015E+044 | 2.9239E+65 |
| Hafnium      | 7E-08 | 178.49   | 1.015E+044 | 3.4233E+65 |
| Gold         | 6E-08 | 196.9666 | 8.7E+043   | 2.6590E+65 |
| Silver       | 6E-08 | 107.8682 | 8.7E+043   | 4.8554E+65 |
| Rhodium      | 6E-08 | 102.9055 | 8.7E+043   | 5.0895E+65 |
| Thallium     | 5E-08 | 204.38   | 7.25E+043  | 2.1355E+65 |
| Tungsten     | 5E-08 | 183.84   | 7.25E+043  | 2.3741E+65 |
| Holmium      | 5E-08 | 164.9303 | 7.25E+043  | 2.6463E+65 |
| Terbium      | 5E-08 | 158.9254 | 7.25E+043  | 2.7463E+65 |
| Europium     | 5E-08 | 151.964  | 7.25E+043  | 2.8721E+65 |
| Thorium      | 4E-08 | 232.0377 | 5.8E+043   | 1.5048E+65 |
| Antimony     | 4E-08 | 121.76   | 5.8E+043   | 2.8676E+65 |
| Indium       | 3E-08 | 114.818  | 4.35E+043  | 2.2807E+65 |
| Uranium      | 2E-08 | 238.0289 | 2.9E+043   | 7.3344E+64 |
| Rhenium      | 2E-08 | 186.207  | 2.9E+043   | 9.3756E+64 |
| Lutetium     | 1E-08 | 174.9668 | 1.45E+043  | 4.9889E+64 |
| Thulium      | 1E-08 | 168.9342 | 1.45E+043  | 5.1671E+64 |
| Tantalum     | 8E-09 | 180.9479 | 1.16E+043  | 3.8592E+64 |
